# Supplementary material for: A fundamental analysis of enhanced cross-coupling catalytic activity for palladium clusters on graphene supports
Source: Royal Society of Chemistry journal article supplement (doi:10.1039/c6nr06793j), 2016-01-01
Supplement: c6nr06793j1.pdf [file c6nr06793j1.pdf]

Supplementary Materials for

**A Fundamental Analysis of Enhanced Cross-Coupling Catalytic Activity for Palladium Clusters on Graphene Supports**

**Y. Yang,<sup>a</sup> C. E. Castano,<sup>a</sup> B. Frank Gupton,<sup>a\*</sup> A. C. Reber<sup>b</sup> and S. N. Khanna<sup>b\*</sup>**

**Affiliations:**

<sup>a</sup>Department of Chemical and Life Science Engineering, Virginia Commonwealth University Richmond, VA 23284

<sup>b</sup>Department of Physics, Virginia Commonwealth University, Richmond, VA 23284

\*Correspondence to: [bfgupton@vcu.edu](mailto:bfgupton@vcu.edu) (B. Frank Gupton), [snkhanna@vcu.edu](mailto:snkhanna@vcu.edu) (S. N. Khanna)

Table of contents

|                                                                                                                            |    |
|----------------------------------------------------------------------------------------------------------------------------|----|
| S1 Materials and methods .....                                                                                             | 2  |
| S2 Structure and energy of Free Pd <sub>n</sub> Cluster .....                                                              | 5  |
| S3 Structure and energy of defected graphene .....                                                                         | 8  |
| S4 Structure and energy of Pd <sub>n</sub> cluster binding to defected graphene.....                                       | 10 |
| S5 Structure energy and charge state of Pd <sub>n</sub> (n=1-14) cluster binding to double vacancy defected graphene ..... | 12 |
| S6 Energy and charge state in oxidative addition reaction.....                                                             | 16 |
| S7 Structure and energy of bromine absorption .....                                                                        | 19 |
| S8 Density of state of the complexes at transition state .....                                                             | 20 |
| S9 Energy and charge analysis in oxidative addition reaction .....                                                         | 22 |
| S10 Catalyst particle size distribution .....                                                                              | 23 |
| S11 Control experiments Suzuki reaction .....                                                                              | 25 |
| S12 Different reaction condition for three phase test .....                                                                | 26 |

## **S1 Materials and methods**

### **Materials**

Single layer Graphene oxide was purchased from Graphene Laboratories Inc. and used after purified. Rink amide MBHA resin (200-400 mesh, 0.07 mmol/g) was purchased from Che-IMPEX INT'L Inc.. Palladium nitrate (10 wt.% in 10 wt.% HNO<sub>3</sub>, 99.999%) and hydrazine hydrate were obtained from Sigma Aldrich. 4-Iodo-benzonic acid, 4-Iodo-benzamide, potassium carbonate, phenylboronic acid, 1-hydroxybenzotriazole and N,N'-diisopropylcarbodiimide were also purchased from Aldrich and used as received.

### **Typical procedure for Suzuki reaction**

Bromobenzene (50 mg, 0.32 mmol, 1 eq.) was dissolved in a mixture of 4 mL H<sub>2</sub>O–EtOH (1 : 1) and placed in a 10 mL microwave tube. Phenyl boronic acid (47 mg, 0.382 mmol, 1.2 eq.), potassium carbonate (133 mg, 0.96 mmol, 3 eq.) was then added to the solution. 0.5 % Pd/G was then added, the tube was sealed, stirred and heated at 80 °C for 10 min under microwave irradiation (250 W, 2.45 MHz). After the reaction, the mixture was diluted with 10 mL of EtOH and test in GCMS/HPLC.

### **Leaching test**

Prepare 4-Iodo-benzamide bound rink amide resin

Rink amide resin (1.0 g) was added to a 30 ml cartridge with 70 $\mu$  frit.

Dimethylformamide (DMF) 20 ml was then added to swell the resin for 30 min.

Piperidine 20% was added to remove the protecting group. 4-Iodo-benzonic acid (1.04 g, 4.2 mmol), hydroxybenzotriazole (0.642 g, 4.2mmol) and diisopropylcarbodiimide (0.529

g, 4.2mmol) were premixed in  $\text{CH}_2\text{Cl}_2$  (20ml) then added to the resin. The cartridge was capped and stirred for 6 hours. The  $\text{CH}_2\text{Cl}_2$  was then removed. The resin was wash in dimethylformamide ( $3 \times 15$  ml),  $\text{CH}_2\text{Cl}_2$  ( $3 \times 15$  ml) and methanol ( $3 \times 15$  ml) for 2 min each washing. The resin was dried in a vacuum for 24 hours at 0 °C. The 4-Iodo-benzamide bound rink amide resin was then stored at 0 °C when not in use. To determine the 4-Iodo-benzamide loading, 100mg 4-Iodo-benzamide bound rink amide resin was added to 5ml DMF to swelling for 30 min in a 10 ml cartridge with 70 $\mu$  frit. Trifluoroacetic acid (0.95 ml) and deionized  $\text{H}_2\text{O}$  (0.05 ml) was add to the resin after remove DMF. The cartridge was then capped and stirred for 4 hours. The solution was then collected and washed with DMF ( $2 \times 5$  ml) and  $\text{CH}_2\text{Cl}_2$  ( $2 \times 5$  ml). All wash solutions were combined with first solution then run through HPLC (Water Acquity H class) and GC/MS (HP 6890 Series) versus internal standard. 4-Iodo-benzamide 0.102 g was yielded which correlate to 0.7 mmol/g loading resin.

### Three phase test

100mg 4-Iodo-benzamide bound rink amide resin (0.07mmol 4-Iodo-benzamide) was added to 5ml DMF to swelling for 30 min in a 10 ml cartridge with 70 $\mu$  frit. The DMF was then removed. Phenlboronic acid (24.5 mg, 0.22 mmol),  $\text{K}_2\text{CO}_3$  (55.2 mg, 0.4 mmol), Pd/G catalyst 30% and swelled resin were added to 2 ml ethanol and  $\text{H}_2\text{O}$  (1:1) solution. The cartridge was capped and stirred for 20 hours at rt. The resin was then wash in dimethylformamide ( $3 \times 2$  ml),  $\text{CH}_2\text{Cl}_2$  ( $3 \times 2$  ml) and methanol ( $3 \times 2$  ml) for 2 min each washing. Trifluoroacetic acid (0.95 ml) and deionized  $\text{H}_2\text{O}$  (0.05 ml) was add to the resin after wasing. The cartridge was then capped and stirred for 4 hours. The solution was then collected and washed with DMF ( $2 \times 5$  ml) and  $\text{CH}_2\text{Cl}_2$  ( $2 \times 5$  ml). All wash

solutions were combined with first solution then run through HPLC versus internal standard.

## S2 Structure and energy of Free Pd<sub>n</sub> Cluster

Fig. S1

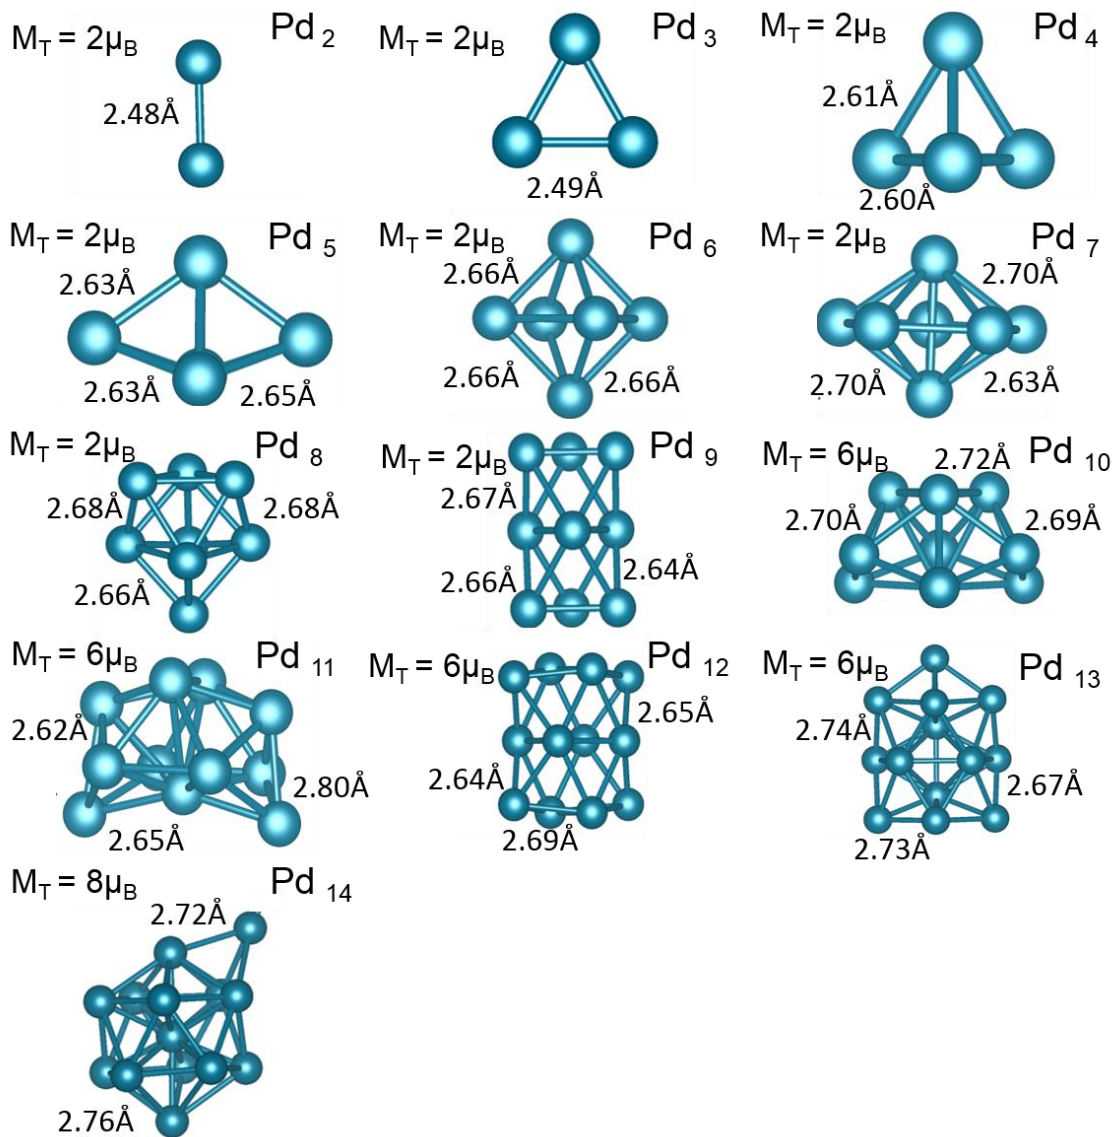

**Fig. S1** The ground state atomic structures, magnetic moment and selected bond length of free Pd<sub>2-14</sub> clusters.

**Table S1**

| Pd cluster | Avg. Binding energy (eV) | Spin multiplicity | Ionization potential (eV) |
|------------|--------------------------|-------------------|---------------------------|
| 1          | -                        | 1                 | 8.80                      |
| 2          | 0.65                     | 3                 | 7.77                      |
| 3          | 1.27                     | 3                 | 7.81                      |
| 4          | 1.68                     | 3                 | 6.78                      |
| 5          | 1.81                     | 3                 | 6.62                      |
| 6          | 1.89                     | 3                 | 6.41                      |
| 7          | 2.01                     | 3                 | 6.37                      |
| 8          | 2.11                     | 3                 | 6.18                      |
| 9          | 2.20                     | 3                 | 6.15                      |
| 10         | 2.24                     | 7                 | 6.19                      |
| 11         | 2.29                     | 7                 | 6.22                      |
| 12         | 2.35                     | 7                 | 6.21                      |
| 13         | 2.41                     | 7                 | 5.95                      |
| 14         | 2.43                     | 9                 | 5.91                      |

**Table S1** Average binding energy, spin multiplicity and vertical ionization potential of Pd<sub>1-13</sub> cluster are listed.

We calculated the average binding energy (ABE) per atom using the expression

$$\text{Avg} = (nE(\text{Pd}) - E(\text{Pd}_n))/n$$

where  $E(\text{Pd}_n)$  is the total energy of the cluster of  $n$  atoms, and  $E(\text{Pd})$  is the atomic energy.

We also calculated the vertical ionization potential (VIP)

$$\text{VIP} = E(\text{Pd}_n^+) - E(\text{Pd}_n)$$

as the difference in energy between the ground state of the neutral and that of the cation in the neutral ground state geometry.

**Fig. S2**

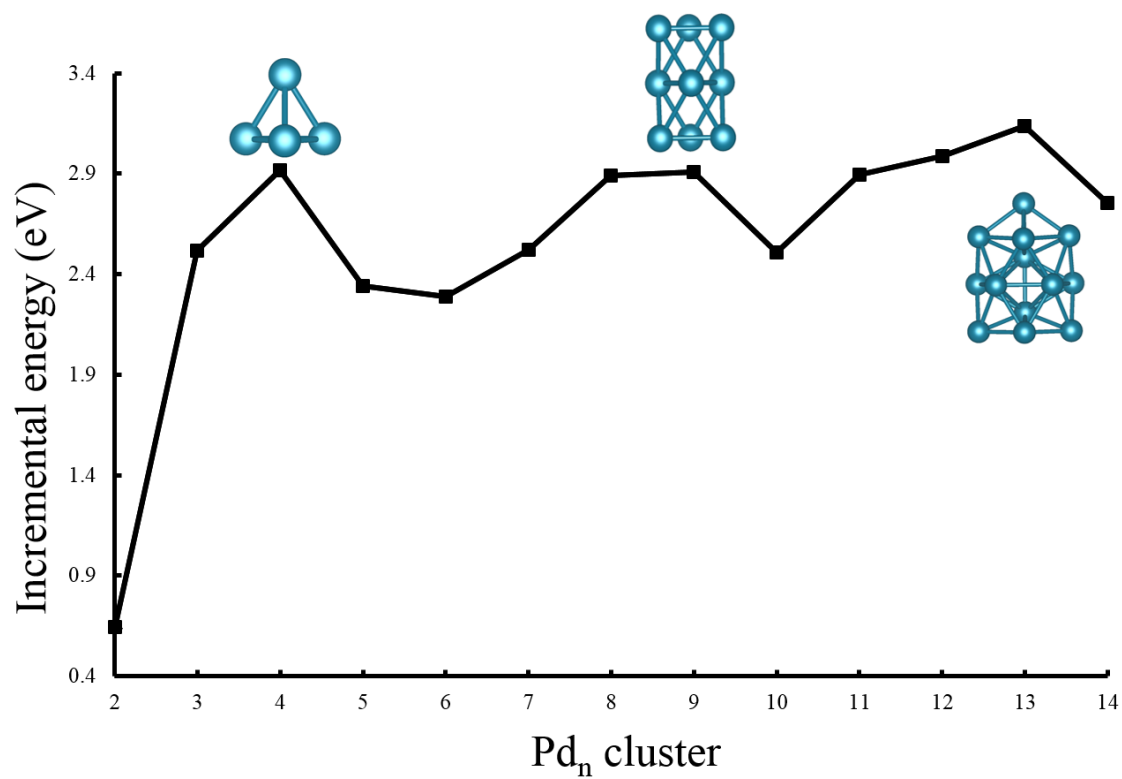

**Fig. S2** Incremental binding energy of Pd<sub>2-13</sub> cluster indicates that Pd<sub>4</sub>, Pd<sub>9</sub> and Pd<sub>13</sub> show local maxima energy.

### S3 Structure and energy of defected graphene

Fig. S3

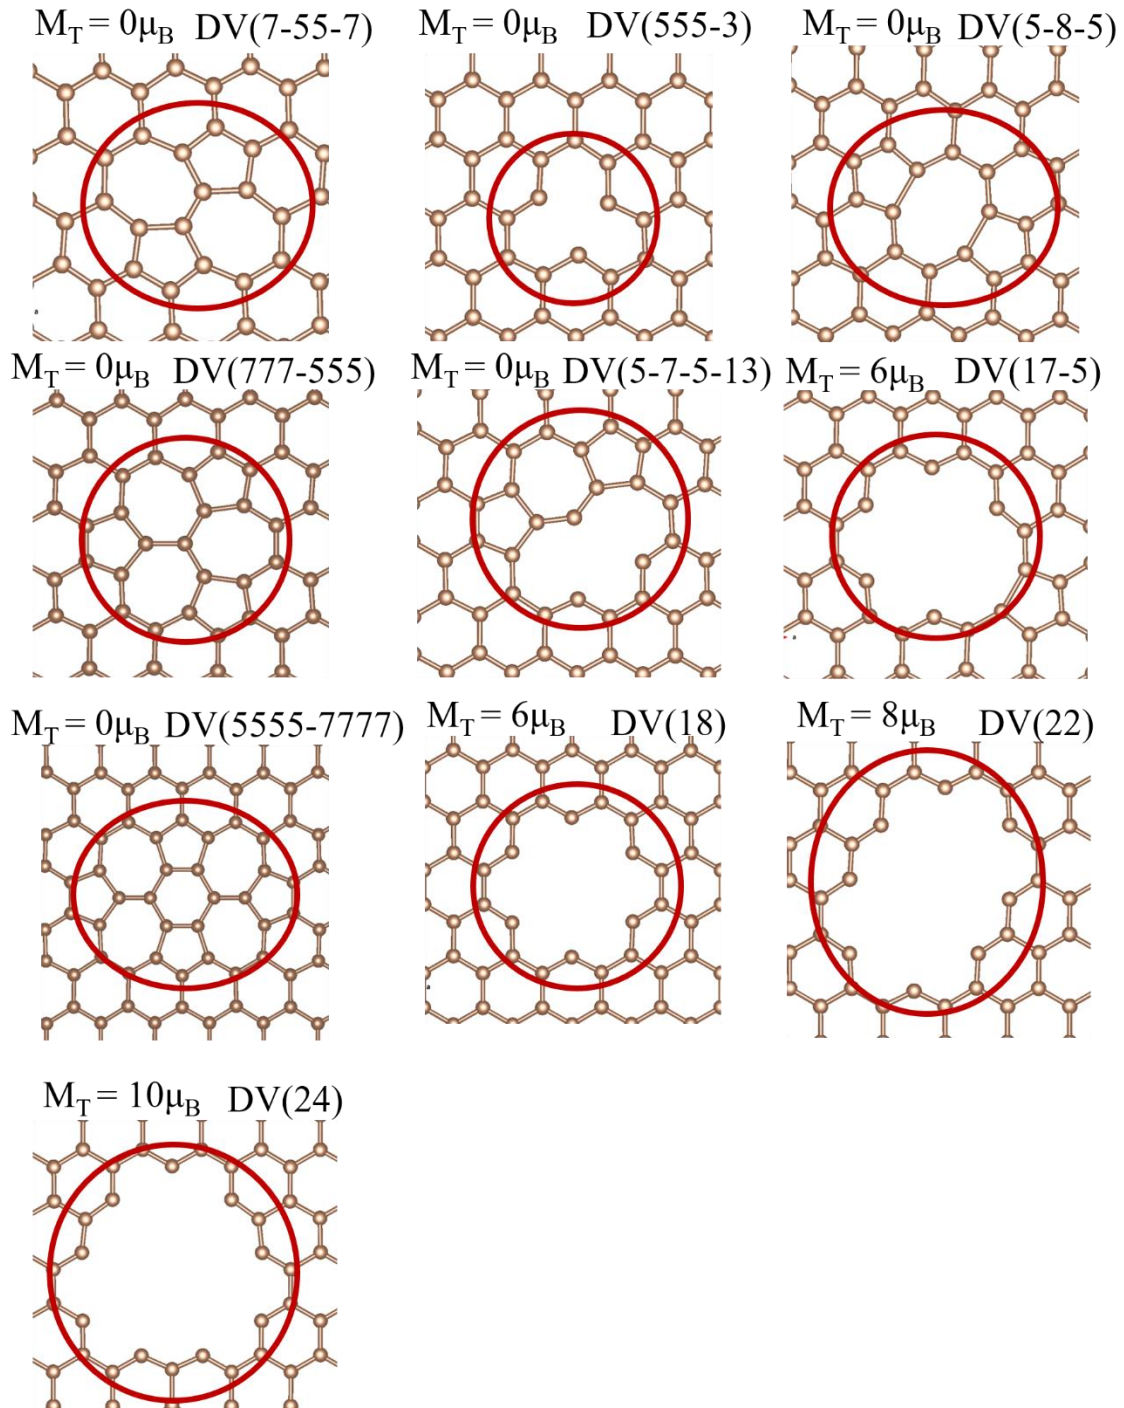

Fig. S3 Spin magnetic moment and the nature of the polygons around the defected site



**Table S2**

| Defected graphene | Size of Vacancy<br>(Num. of C) | Size of Vacancy<br>(Å) | Defect<br>energy (eV) | Spin<br>multiplicity |
|-------------------|--------------------------------|------------------------|-----------------------|----------------------|
| DV(7-55-7)        | 0                              | 3.2                    | 5.11                  | 1                    |
| DV(555-3)         | 1                              | 4.4                    | 17.12                 | 1                    |
| DV(7777-5555)     | 2                              | 3.2                    | 25.82                 | 1                    |
| DV(777-555)       | 2                              | 3.2                    | 26.17                 | 1                    |
| DV(5-8-5)         | 2                              | 5.0                    | 26.36                 | 1                    |
| DV(5-7-5-13)      | 3                              | 5.5                    | 40.97                 | 1                    |
| DV(18)            | 6                              | 6.7                    | 72.97                 | 7                    |
| DV(17-5)          | 7                              | 7.0                    | 83.67                 | 7                    |
| DV(22)            | 10                             | 8.6                    | 115.97                | 9                    |
| DV(24)            | 13                             | 9.0                    | 148.56                | 11                   |

**Table S2** The nature and size of the defect and the associated spin multiplicity are listed.

Defected site is shown according to the number of missing carbon and size in Angstrom.

Defect energy is the energy difference between defected graphene sheet and pristine graphene sheet.

### S4 Structure and energy of Pd<sub>n</sub> cluster binding to defected graphene

Fig. S4

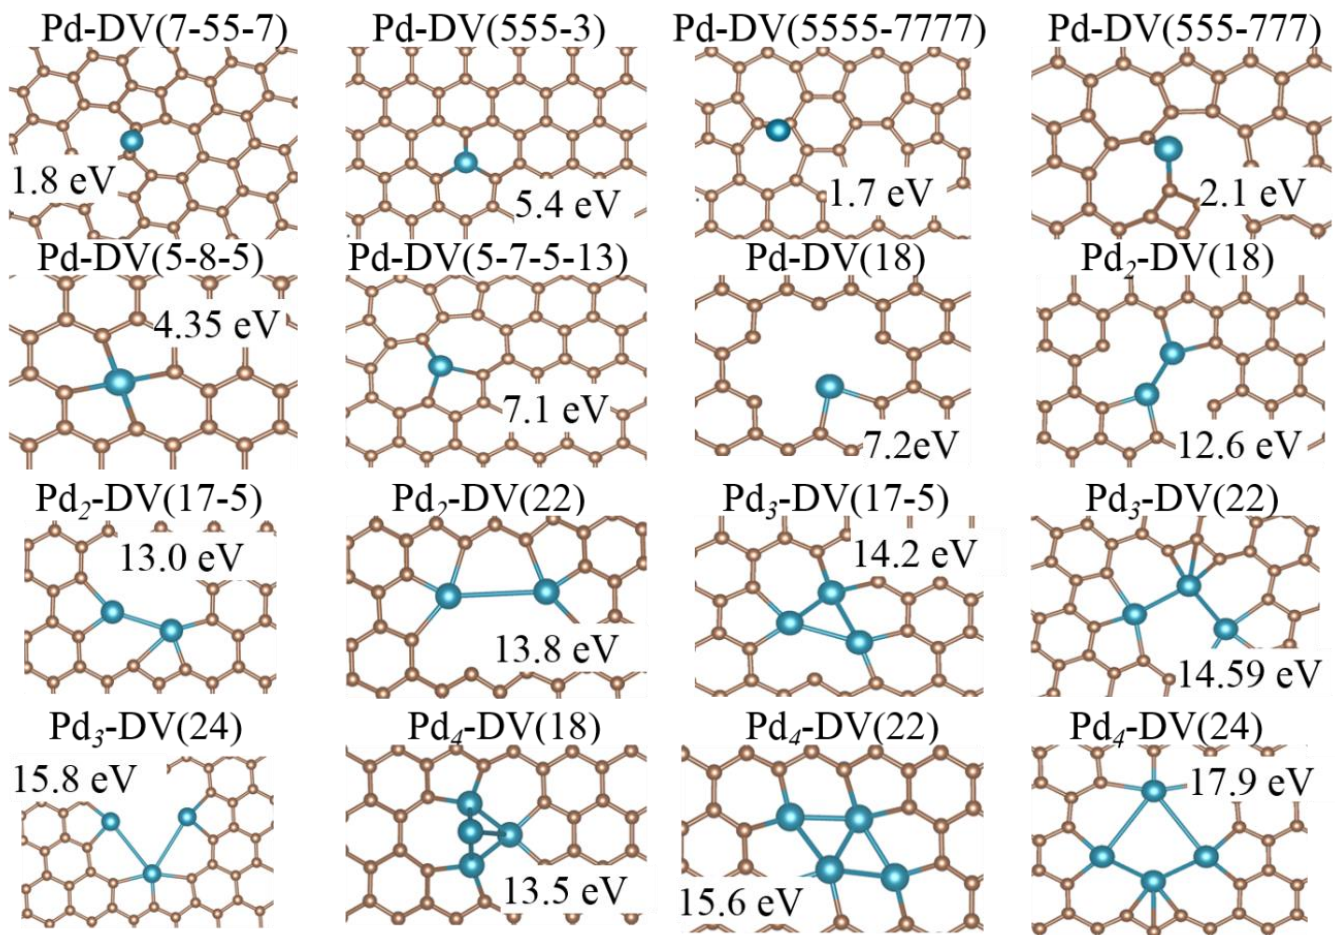

Fig. S4 Pd<sub>1-5</sub> bound to various size and structure of vacancy defected graphene.

**Table S3**

| Pd-Defected graphene      | Size of Vacancy<br>(Num. of C) | Pd binding<br>energy (eV) | Spin multiplicity |
|---------------------------|--------------------------------|---------------------------|-------------------|
| Pd-DV(7-55-5)             | 0                              | 1.8                       | 1                 |
| Pd-DV(555-3)              | 1                              | 5.4                       | 1                 |
| Pd-DV(5555-7777)          | 2                              | 1.7                       | 1                 |
| Pd-DV(777-555)            | 2                              | 2.1                       | 1                 |
| Pd-DV(5-8-5)              | 2                              | 4.3                       | 1                 |
| Pd-DV(5-7-5-13)           | 3                              | 7.1                       | 1                 |
| Pd-DV(18)                 | 6                              | 7.2                       | 1                 |
| Pd <sub>2</sub> -DV(18)   | 6                              | 12.6                      | 1                 |
| Pd <sub>2</sub> -DV(17-5) | 7                              | 13.0                      | 1                 |
| Pd <sub>2</sub> -DV(22)   | 10                             | 13.8                      | 1                 |
| Pd <sub>3</sub> -DV(17-5) | 7                              | 14.2                      | 1                 |
| Pd <sub>3</sub> -DV(22)   | 10                             | 14.5                      | 1                 |
| Pd <sub>3</sub> -DV(24)   | 13                             | 15.8                      | 1                 |
| Pd <sub>4</sub> -DV(18)   | 6                              | 13.5                      | 1                 |
| Pd <sub>4</sub> -DV(22)   | 10                             | 15.6                      | 1                 |
| Pd <sub>4</sub> -DV(24)   | 13                             | 17.9                      | 1                 |

**Table S3** The binding energy of Pd<sub>1-4</sub> bound to various sizes and structures of vacancy

defected graphene are listed, along with the spin multiplicity.

**S5 Structure energy and charge state of Pd<sub>n</sub> (n=1-14) cluster binding to double vacancy defected graphene**

**Fig. S5**

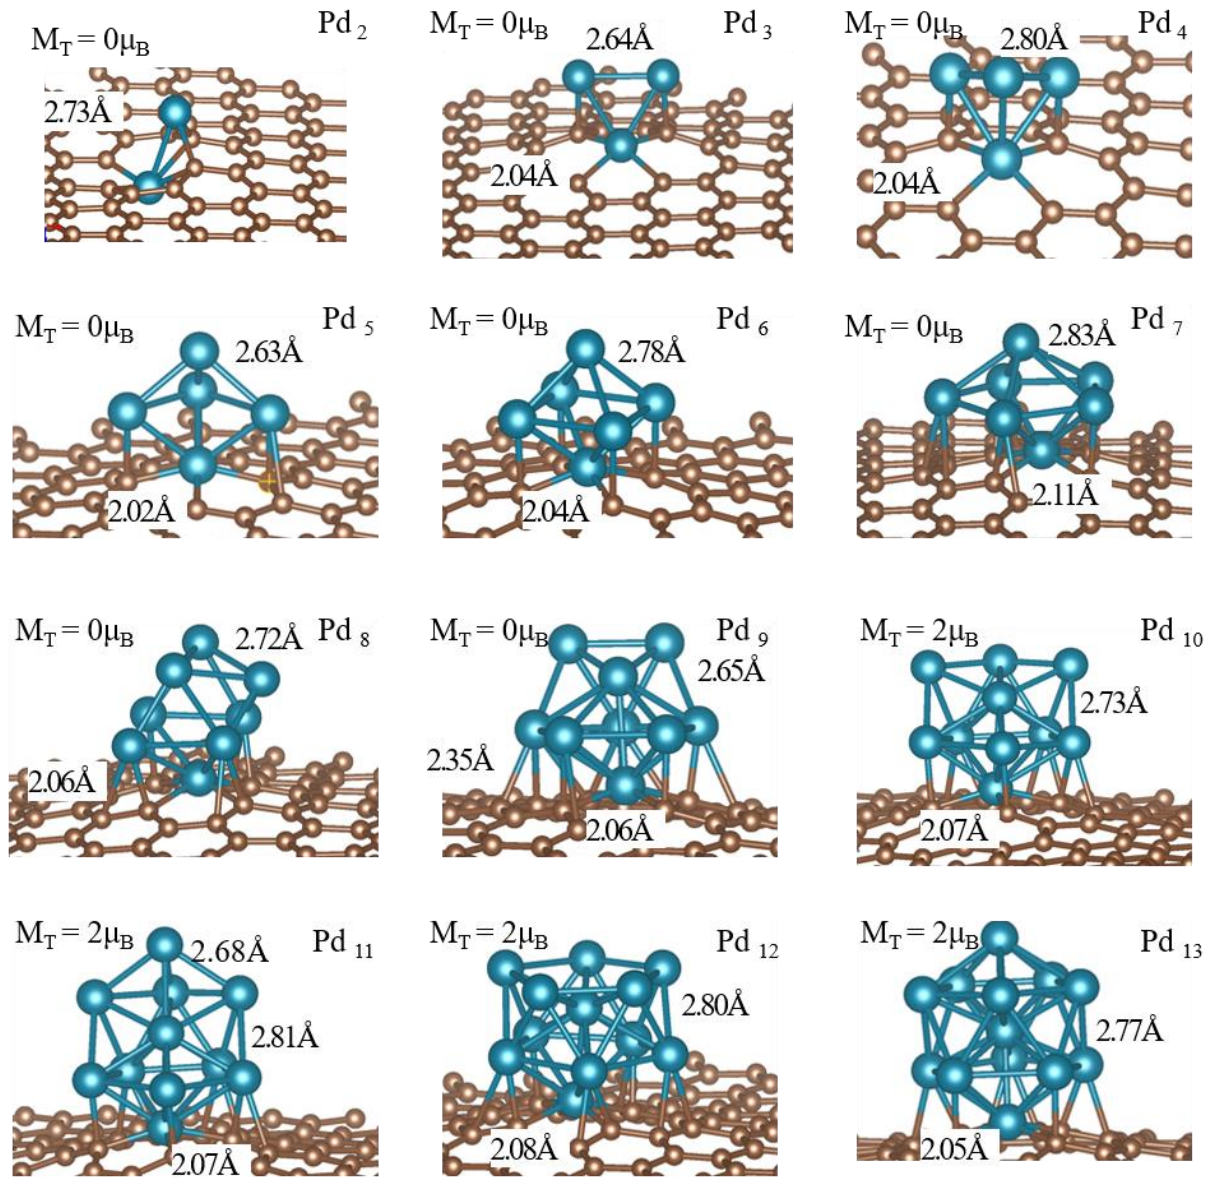

**Fig. S5** Ground state geometries of Pd<sub>2-13</sub> clusters on the double vacancy defected site are showed along with selected bond length and magnetic moment.

The ground state geometries are generally compact and in special cases, there are significant changes in the shape of the cluster. For example, for Pd<sub>13</sub>, the ground state of the free cluster is a bi-layer structure while the ground state of the deposited species is a slightly distorted icosahedral structure. The change in structure can be related to the charging of the cluster and the effect of the support that can affect the ground state.

Starting from Pd<sub>4</sub>, the binding energy to the defect generally increases with cluster size and a Pd<sub>13</sub> is bound by almost 7.4 eV compared to 5.4 eV for Pd<sub>4</sub>. The increase in binding is accompanied by the larger charge donated to the surface and almost half the charge donated to the surface is derived from the Pd sites anchoring the cluster to the surface.

**Table S4**

| Pd cluster | Avg. Pd Binding energy (eV) | Binding energy to defected graphene(eV) | Spin multiplicity | Charge donated to surface by Pd cluster | Charge donated to surface by anchor Pd |
|------------|-----------------------------|-----------------------------------------|-------------------|-----------------------------------------|----------------------------------------|
| 2          | 3.62                        | 6.24                                    | 1                 | 0.80                                    | 0.48                                   |
| 3          | 3.11                        | 5.52                                    | 1                 | 0.78                                    | 0.58                                   |
| 4          | 2.97                        | 5.39                                    | 1                 | 0.76                                    | 0.57                                   |
| 5          | 2.94                        | 5.82                                    | 1                 | 0.90                                    | 0.59                                   |
| 6          | 2.97                        | 6.04                                    | 1                 | 0.92                                    | 0.60                                   |
| 7          | 2.91                        | 6.43                                    | 1                 | 1.09                                    | 0.59                                   |
| 8          | 2.89                        | 6.38                                    | 1                 | 1.02                                    | 0.60                                   |
| 9          | 2.90                        | 6.35                                    | 1                 | 1.09                                    | 0.58                                   |
| 10         | 2.91                        | 7.11                                    | 3                 | 1.10                                    | 0.58                                   |
| 11         | 2.90                        | 7.34                                    | 3                 | 1.13                                    | 0.58                                   |
| 12         | 2.90                        | 7.04                                    | 3                 | 1.14                                    | 0.59                                   |
| 13         | 2.94                        | 7.42                                    | 3                 | 1.10                                    | 0.57                                   |
| 14         | 2.92                        | 6.88                                    | 4                 | 1.07                                    | 0.57                                   |

**Table S4** Binding energy, spin multiplicity and charge state of Pd<sub>2-13</sub> cluster are listed.

Average binding energy is in the form of binding energy per Pd atom. The binding energy to the defect is the binding energy between the cluster defected graphene.

The Avg. Pd Binding energy (eV) was calculated as:

$$\text{Avg } E = (E(\text{Pd}_n/\text{graphene}) - nE(\text{Pd}) - E(\text{graphene}))/n$$

where  $E(\text{Pd}_n/\text{graphene})$  is the total energy of the cluster and graphene,  $E(\text{graphene})$  is the energy of graphene and  $E(\text{Pd})$  is the atomic energy.

**Table S5**

| Pd <sub>1-14</sub>             |       | Pd <sub>1</sub> | Pd <sub>2</sub> | Pd <sub>3</sub> | Pd <sub>4</sub> | Pd <sub>5</sub> | Pd <sub>6</sub> | Pd <sub>7</sub> | Pd <sub>8</sub> | Pd <sub>9</sub> | Pd <sub>10</sub> | Pd <sub>11</sub> | Pd <sub>12</sub> | Pd <sub>13</sub> | Pd <sub>14</sub> |
|--------------------------------|-------|-----------------|-----------------|-----------------|-----------------|-----------------|-----------------|-----------------|-----------------|-----------------|------------------|------------------|------------------|------------------|------------------|
| Anchor (e <sup>-</sup> )       | Pd-1  | 9.46            | 9.51            | 9.42            | 9.42            | 9.51            | 9.39            | 9.41            | 9.39            | 9.41            | 9.41             | 9.41             | 9.41             | 9.42             | 9.43             |
| Bottom layer (e <sup>-</sup> ) | Pd-2  |                 | 9.67            | 9.91            | 9.86            | 9.83            | 9.89            | 9.89            | 9.82            | 9.87            | 9.82             | 9.82             | 9.82             | 9.86             | 9.92             |
|                                | Pd-3  |                 |                 | 9.88            | 9.87            | 9.89            | 9.88            | 9.91            | 9.86            | 9.82            | 9.93             | 9.83             | 9.85             | 9.95             | 9.90             |
|                                | Pd-4  |                 |                 |                 | 10.07           | 9.82            | 9.88            | 9.84            | 9.90            | 9.84            | 9.85             | 9.86             | 9.85             | 9.88             | 9.83             |
|                                | Pd-5  |                 |                 |                 |                 | 10.14           | 9.90            | 9.87            | 9.85            | 9.83            | 9.87             | 9.88             | 9.83             | 9.87             | 9.87             |
|                                | Pd-6  |                 |                 |                 |                 |                 | 10.10           | 9.85            | 10.01           | 9.91            | 9.97             | 9.89             | 9.97             | 9.90             | 9.84             |
| Top layer (e <sup>-</sup> )    | Pd-7  |                 |                 |                 |                 |                 |                 | 10.10           | 10.04           | 10.08           | 10.05            | 9.97             | 9.97             | 10.00            | 9.96             |
|                                | Pd-8  |                 |                 |                 |                 |                 |                 |                 | 10.07           | 10.03           | 10.01            | 10.01            | 10.05            | 10.05            | 10.08            |
|                                | Pd-9  |                 |                 |                 |                 |                 |                 |                 |                 | 10.07           | 10.07            | 10.07            | 10.04            | 10.04            | 10.05            |
|                                | Pd-10 |                 |                 |                 |                 |                 |                 |                 |                 |                 | 10.01            | 10.05            | 10.04            | 10.03            | 10.01            |
|                                | Pd-11 |                 |                 |                 |                 |                 |                 |                 |                 |                 |                  | 10.01            | 10.04            | 10.06            | 10.00            |
|                                | Pd-12 |                 |                 |                 |                 |                 |                 |                 |                 |                 |                  |                  | 10.04            | 10.05            | 10.03            |
|                                | Pd-13 |                 |                 |                 |                 |                 |                 |                 |                 |                 |                  |                  |                  | 10.05            | 10.07            |

**Table S5** Individual Pd atom charge states in double vacancy defected graphene

supported Pd<sub>n</sub> clusters (n=1-14) are shown in the list. Anchor Pd is marked by large electrons transfer to graphene substrate. Bottom layer Pd atoms show slightly positive charge in some structure. Upper layer Pd, on the other hand, is neutral. Note that the charge on neutral Pd atom is 10 (e<sup>-</sup>)

## S6 Energy and charge state in oxidative addition reaction

**Table S6**

| Pd cluster                 | Reactant<br>$E_b$ (eV) | Product<br>$E_b$ (eV) | Energy<br>Gain (eV) | Br-C distance<br>(Å) | Activation<br>Energy(eV) |
|----------------------------|------------------------|-----------------------|---------------------|----------------------|--------------------------|
| Pd <sub>4</sub>            | 1.05                   | 1.99                  | 0.94                | 1.932                | 0.21                     |
| Pd <sub>13</sub>           | 2.65                   | 3.10                  | 0.55                | 1.936                | 0.37                     |
| Pd <sub>14</sub>           | 1.92                   | 2.64                  | 0.72                | 1.934                | 0.31                     |
| Pd <sub>4</sub> /graphene  | 1.90                   | 2.47                  | 0.57                | 1.934                | 0.08                     |
| Pd <sub>13</sub> /graphene | 2.31                   | 3.33                  | 1.02                | 1.932                | 0.15                     |
| Pd <sub>14</sub> /graphene | 0.98                   | 2.44                  | 1.46                | 1.930                | 0.09                     |

**Table S6** The reagent and catalyst binding energy of the initial state and final state are listed as  $E_b$ . The activation energy of the Pd<sub>4</sub>, Pd<sub>13</sub>, and Pd<sub>14</sub> cluster is the energy difference between the initial bound state and the transition state.

Br-C bond Energy  $E_b$ :

$$E_b = E(\text{Pd/g+BaBr}) - E(\text{Pd/g+Ba}) - E(\text{Br})$$

$E(\text{Pd/g+BaBr})$  is the total energy of the system when bromobenzoic acid is deposited on the surface of the catalyst.



**Table S7**

|                  | Initial<br>state( $e^-$ ) | Transition<br>state( $e^-$ ) | Final<br>state( $e^-$ ) |
|------------------|---------------------------|------------------------------|-------------------------|
| Pd               | 0.22                      | 0.24                         | 0.40                    |
| Benzoic acid     | -0.13                     | -0.10                        | -0.05                   |
| Bromine          | -0.08                     | -0.13                        | -0.35                   |
| Pd <sub>4</sub>  | 0.17                      | 0.20                         | 0.65                    |
| Benzoic acid     | -0.14                     | -0.10                        | -0.20                   |
| Bromine          | -0.024                    | -0.10                        | -0.45                   |
| Pd <sub>13</sub> | 0.34                      | 0.48                         | 0.74                    |
| Benzoic acid     | -0.27                     | -0.24                        | -0.38                   |
| Bromine          | -0.064                    | -0.24                        | -0.36                   |
| Pd <sub>14</sub> | 0.16                      | 0.31                         | 0.59                    |
| Benzoic acid     | -0.10                     | -0.10                        | -0.24                   |
| Bromine          | -0.06                     | -0.20                        | -0.35                   |

**Table S7** The table lists the net Bader charge state of the Pd<sub>n</sub> cluster, bromine atom and benzoic acid fragment when the 4-bromo-benzoic acid is in the initial state on the Pd<sub>n</sub> cluster, at the transition state, and at the final product. Note that in isolated 4-bromobenzoic acid, the charge on Br is -0.58 e<sup>-</sup> and benzoic acid is 0.58 e<sup>-</sup>.

**Table S8**

|                   | Isolated catalyst(e <sup>-</sup> ) | Initial state(e <sup>-</sup> ) | Transition state(e <sup>-</sup> ) | Final state(e <sup>-</sup> ) |
|-------------------|------------------------------------|--------------------------------|-----------------------------------|------------------------------|
| Pd <sub>4</sub>   | 0.76                               | 1.53                           | 1.53                              | 1.59                         |
| Anchor Pd         | 0.57                               | 0.57                           | 0.57                              | 0.58                         |
| Benzoic acid      | -                                  | -0.29                          | -0.31                             | -0.23                        |
| Bromine           | -                                  | -0.06                          | -0.06                             | -0.44                        |
| Defected graphene | -0.76                              | -1.18                          | -1.15                             | -0.92                        |
| Pd <sub>13</sub>  | 1.10                               | 1.54                           | 1.59                              | 1.82                         |
| Anchor Pd         | 0.57                               | 0.58                           | 0.58                              | 0.57                         |
| Benzoic acid      | -                                  | -0.30                          | -0.23                             | -0.33                        |
| Bromine           | -                                  | -0.07                          | -0.22                             | -0.37                        |
| Defected graphene | -1.10                              | -1.16                          | -1.15                             | -1.12                        |
| Pd <sub>14</sub>  | 1.07                               | 1.24                           | 1.21                              | 1.75                         |
| Anchor Pd         | 0.57                               | 0.57                           | 0.57                              | 0.57                         |
| Benzoic acid      | -                                  | -0.09                          | -0.05                             | -0.29                        |
| Bromine           | -                                  | -0.07                          | -0.09                             | -0.40                        |
| Defected graphene | -1.07                              | -1.08                          | -1.07                             | -1.07                        |

**Table S8** The table lists the net Bader charge state of the Pd<sub>n</sub> cluster not including the anchor atom, the Pd anchor atom, the bromine atom, the benzoic acid fragment, and the defected graphene sheet when the 4-bromo-benzoic acid is in the initial state on the Pd<sub>n</sub> cluster, at the transition state, and at the final product.

## S7 Structure and energy of bromine absorption

Fig. S6

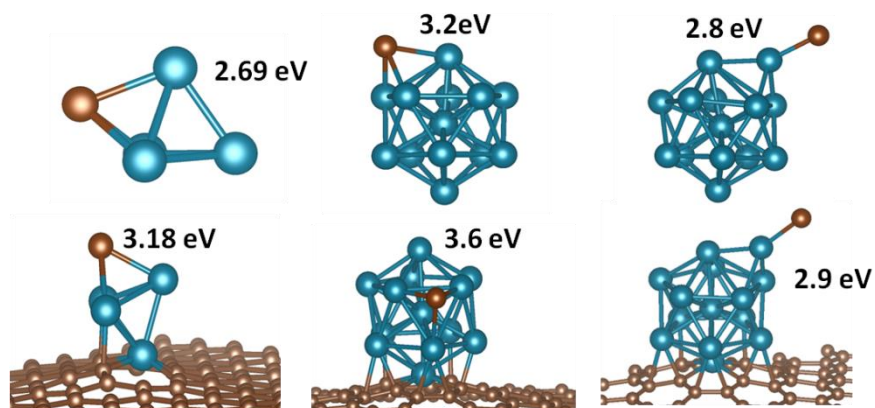

Fig. S6 Ground state structure of absorbed Br atom on free Pd<sub>4</sub>, Pd<sub>13</sub>, Pd<sub>14</sub> cluster and graphene supported Pd<sub>4</sub>, Pd<sub>13</sub>, and Pd<sub>14</sub> cluster.

Table S9

| Pd cluster                 | Br Binding energy(eV) | Charge donated to Br |
|----------------------------|-----------------------|----------------------|
| Pd <sub>4</sub>            | 2.69                  | 0.29                 |
| Pd <sub>13</sub>           | 3.20                  | 0.30                 |
| Pd <sub>14</sub>           | 2.84                  | 0.39                 |
| Pd <sub>4</sub> -graphene  | 3.18                  | 0.36                 |
| Pd <sub>13</sub> -graphene | 3.60                  | 0.35                 |
| Pd <sub>14</sub> -graphene | 2.91                  | 0.39                 |

Table S9 Bromine adsorption energy and charge transfer of free and supported Pd<sub>4</sub>, Pd<sub>13</sub>, and Pd<sub>14</sub> cluster.

## S8 Density of state of the complexes at transition state

Fig. S7

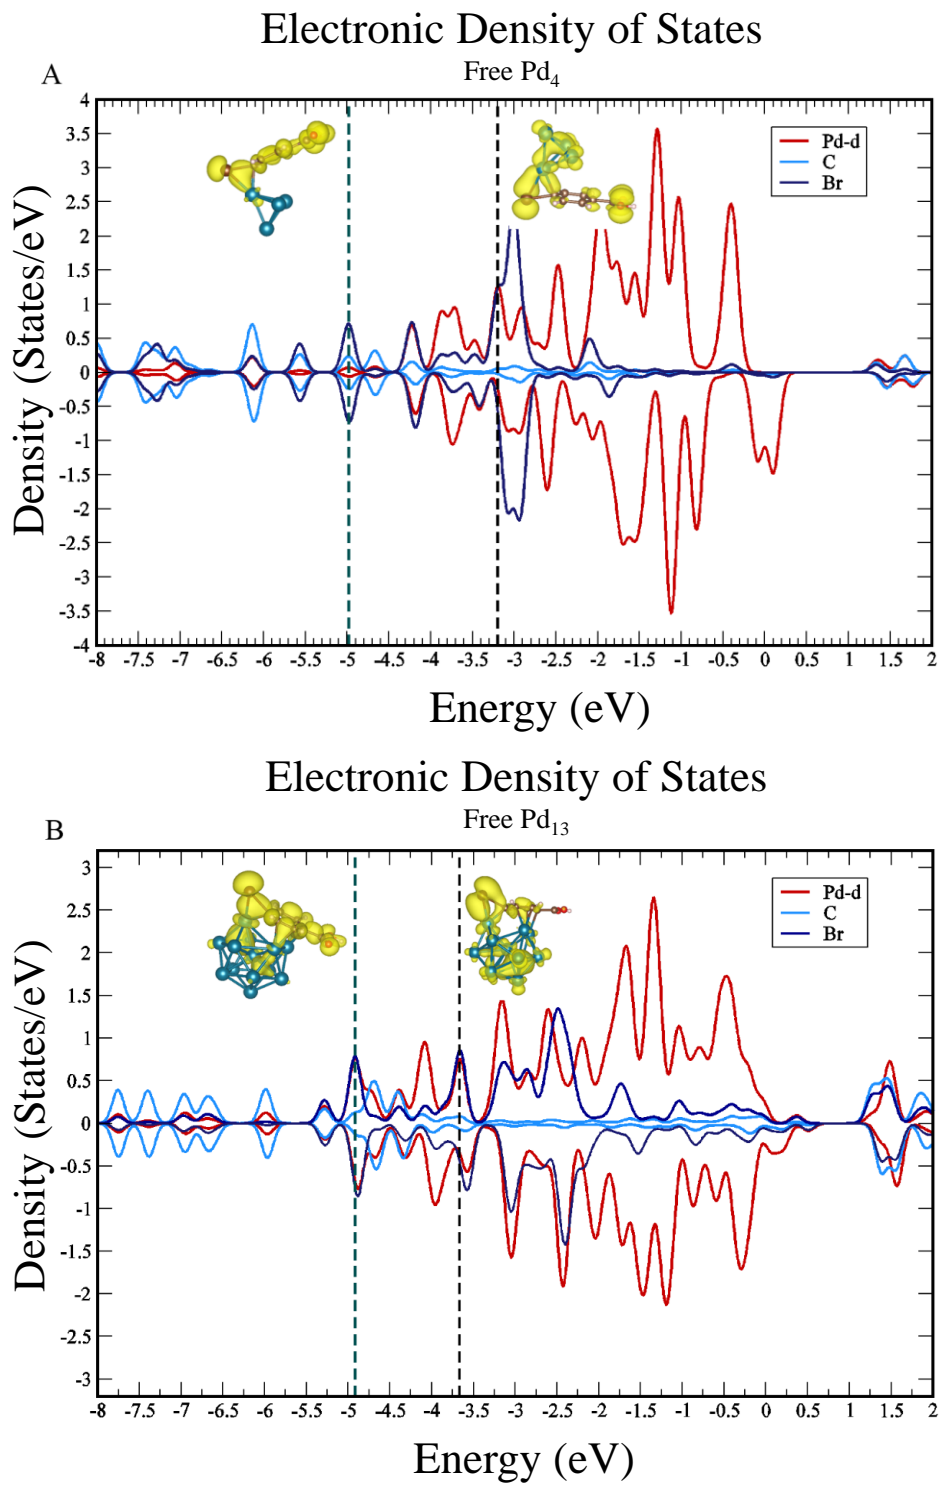

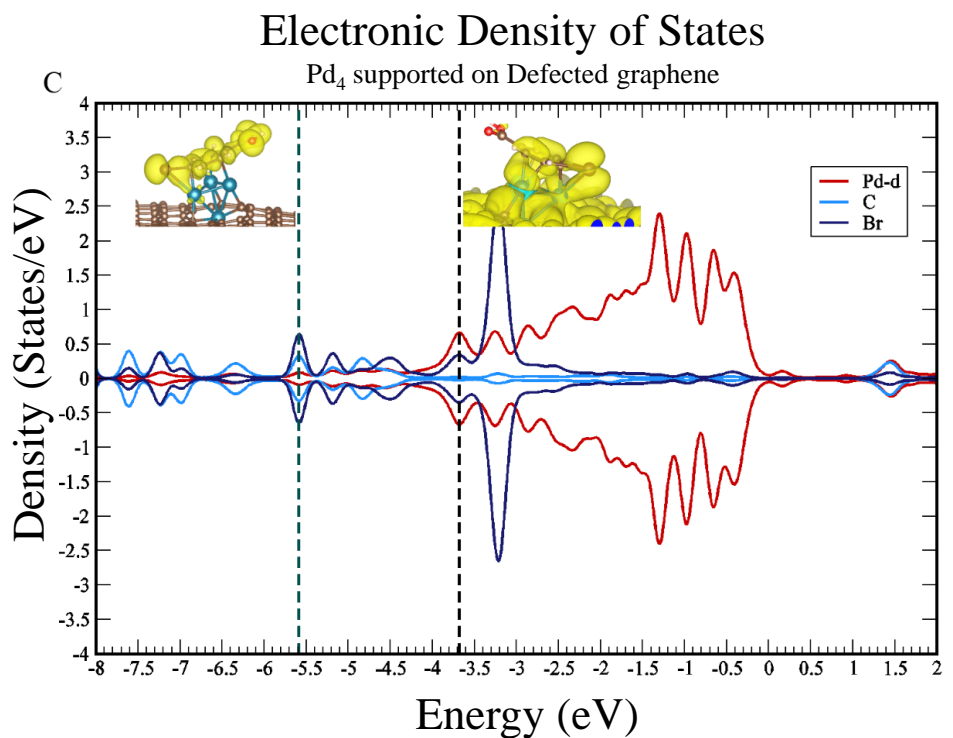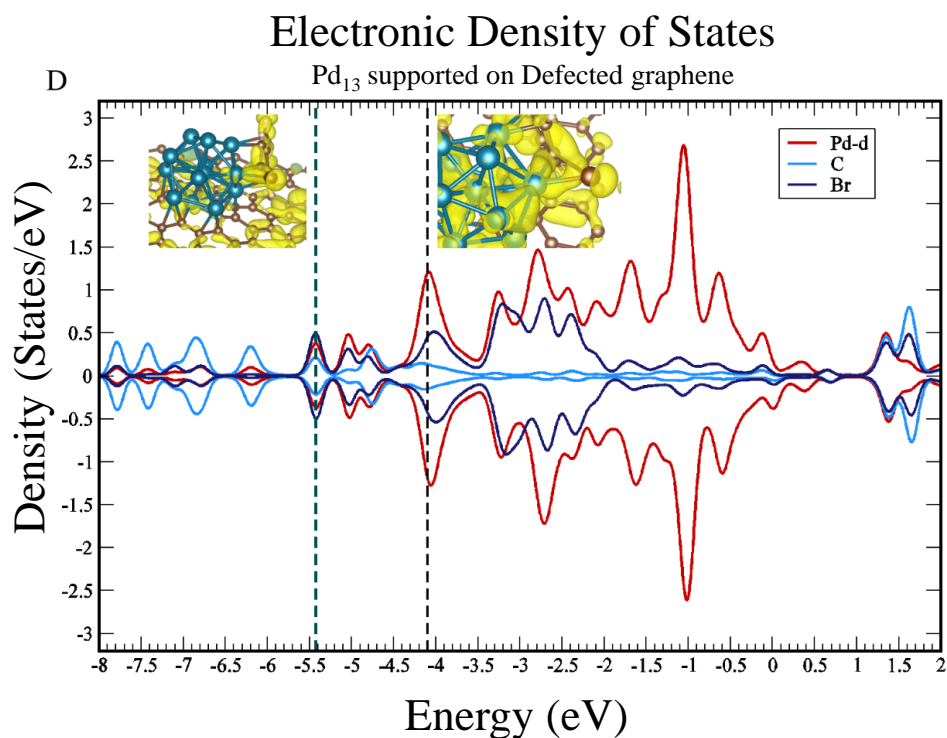

**Fig. S7. A, B, C and D** shows the 4d Pd atom at the active site, C, and Br orbital electron density of states of the Pd atom at the active site at the transition state of free Pd<sub>4</sub>, Pd<sub>13</sub> and supported Pd<sub>4</sub> and Pd<sub>13</sub> respectively in oxidative addition reaction. Both the bonding and antibonding state are shifted left by 0.5eV after deposit the Pd<sub>4</sub> and Pd<sub>13</sub> cluster on defected graphene.

## S9 Energy and charge analysis in oxidative addition reaction

**Table S10**

|                            | Initial state            |                           | Transition state                |                                     |                                          | Final state               |                           |
|----------------------------|--------------------------|---------------------------|---------------------------------|-------------------------------------|------------------------------------------|---------------------------|---------------------------|
|                            | Br-C binding energy (eV) | BA-Pd binding energy (eV) | Bonding state energy level (eV) | Antibonding state energy level (eV) | Charge transfer enhance by supported (%) | Br-Pd binding energy (eV) | BA-Pd binding energy (eV) |
| Free 4-bromobenzoic acid   | 4.11                     | -                         | -                               | -                                   | -                                        | -                         | -                         |
| Pd <sub>4</sub>            | 3.08                     | 2.04                      | -5.0                            | -3.2                                | -                                        | 3.04                      | 3.19                      |
| Pd <sub>4</sub> /graphene  | 2.73                     | 3.41                      | -4.9                            | -3.7                                | 47.6                                     | 3.52                      | 3.20                      |
| Pd <sub>13</sub>           | 3.01                     | 3.89                      | -5.6                            | -3.6                                | -                                        | 3.54                      | 3.89                      |
| Pd <sub>13</sub> /graphene | 2.66                     | 3.91                      | -5.4                            | -4.1                                | 20.0                                     | 3.78                      | 3.91                      |

**Table S10** The Br-C bonding energy, and the benzoic acid binding energy at the initial (complexes) state are shown. At the transition state, the energy of the bonding and antibonding orbital that activates the Br-C bond are listed, as is the charge transfer enhancement that is found by comparing the transition state structure with and without the defected graphene support. At the final state, the binding energy of Br, and benzoic acid are shown.

**S10 Catalyst particle size distribution and survey scan by x-ray photoelectron spectroscopy**

**Fig. S8**

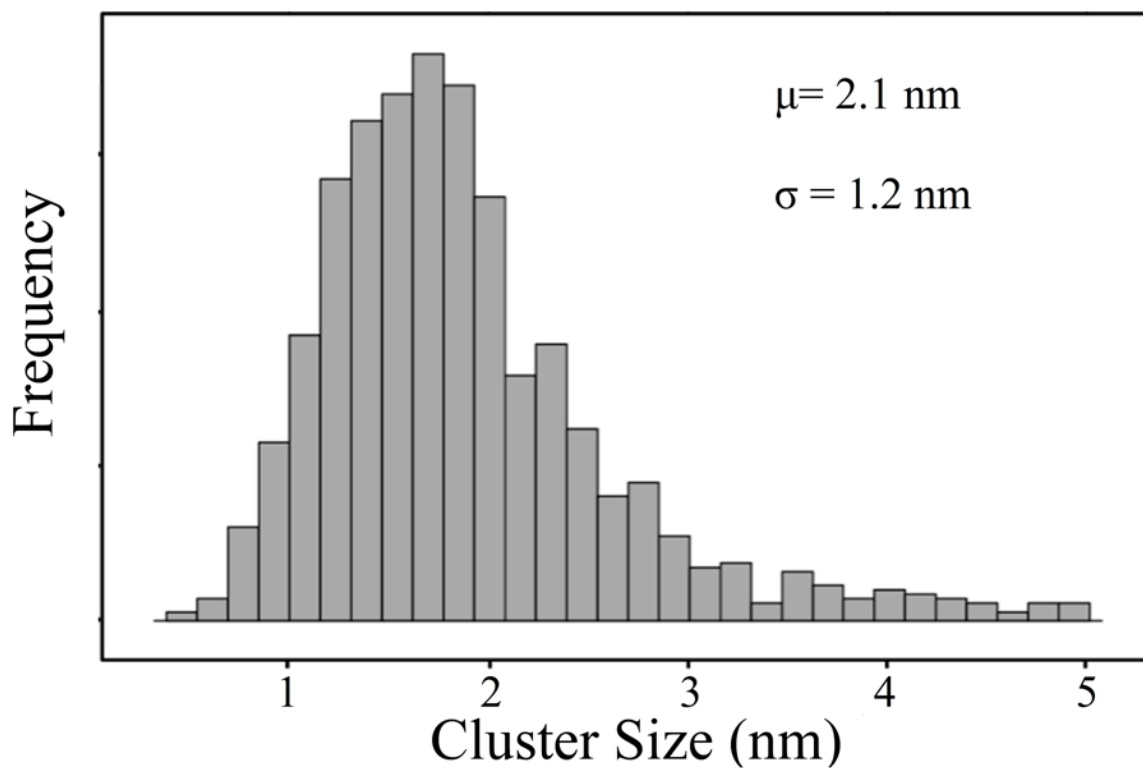

**Fig. S8** Pd/G nanoparticle distribution counted through TEM image shows average size of Pd nanoparticle is 2.1 nm with standard deviation 1.2 nm. Small clusters, size less than 1 nm, exist on the surface as we showed in the theoretical study.

**Fig S9**

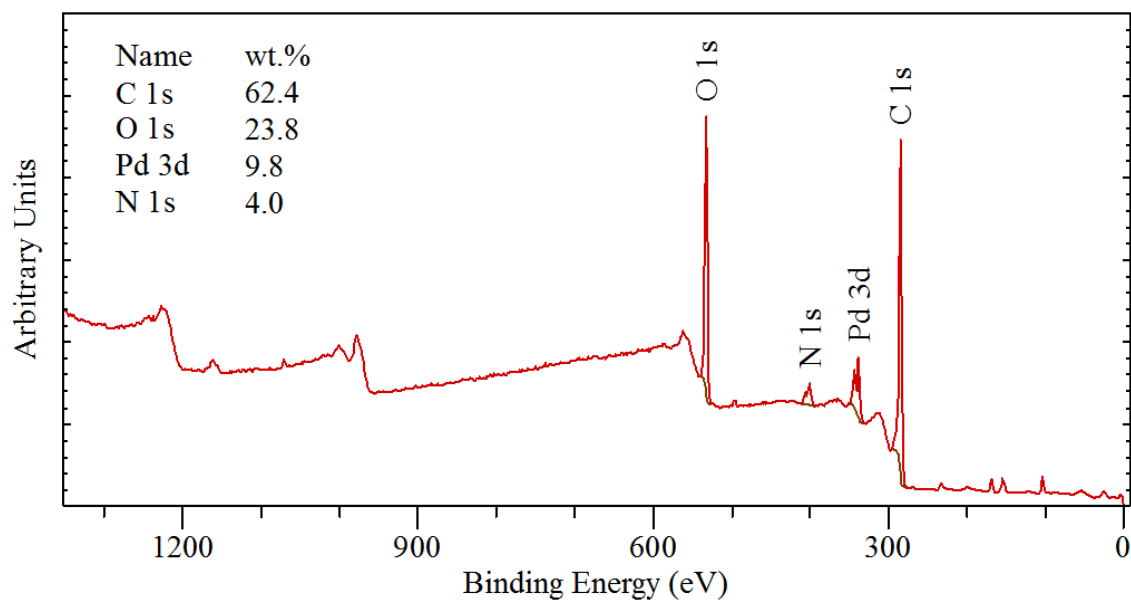

**Fig S9.** Elemental analysis on the surface of Pd/G catalyst measured by x-ray photoelectron spectroscopy.



## S11 Control experiments Suzuki reaction

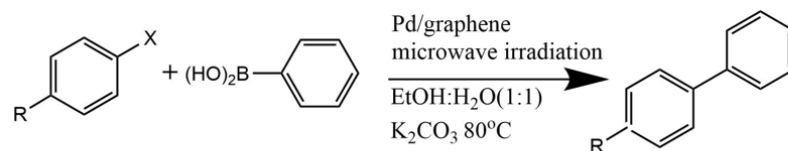

| Entry            | Aryl Halide | Conversion <sup>a</sup> |
|------------------|-------------|-------------------------|
| 1                |             | 100%                    |
| 2                |             | 100%                    |
| 3 <sup>b,c</sup> |             | 100%                    |
| 4                |             | 100%                    |
| 5                |             | 100%                    |
| 6 <sup>b,c</sup> |             | 100%                    |

*a*, Conversion confirmed by GCMS and HPLC. *b*, Similar conversion could be achieved by using Pd(OAc)<sub>2</sub>/PPh<sub>3</sub> Catalyst. *c*, Similar conversion could be achieved by running reaction in 25 °C in 1 hour.

## S12 Different reaction condition for three phase test

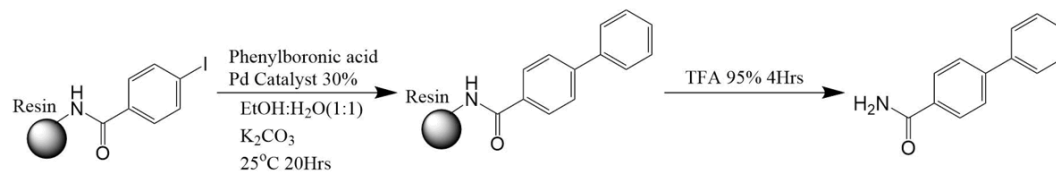

| Resin bounded aryl halide | Pd Catalyst                            | Reaction temperature | Running time (Hour) | Conversion       |
|---------------------------|----------------------------------------|----------------------|---------------------|------------------|
|                           | Pd/graphene                            | 80°C <sup>a</sup>    | 2                   | <1%              |
|                           | Pd(OAc) <sub>2</sub> /PPh <sub>3</sub> | 80°C <sup>a</sup>    | 2                   | 29% <sup>b</sup> |
|                           | Pd/graphene                            | 25°C                 | 20                  | <1%              |
|                           | Pd(OAc) <sub>2</sub> /PPh <sub>3</sub> | 25°C                 | 20                  | 45%              |
|                           | Pd/graphene                            | 80°C <sup>a</sup>    | 2                   | <1%              |
|                           | Pd(OAc) <sub>2</sub> /PPh <sub>3</sub> | 80°C <sup>a</sup>    | 2                   | 33%              |
|                           | Pd/graphene                            | 25°C                 | 20                  | <1%              |
|                           | Pd(OAc) <sub>2</sub> /PPh <sub>3</sub> | 25°C                 | 20                  | 60%              |

*a*, Reaction was heated using microwave irradiation. *b*, Conversion achieved 26% after 30mins.
